# Supplementary material for: Facile synthesis of amine-functionalized SBA-15-supported bimetallic Au–Pd nanoparticles as an efficient catalyst for hydrogen generation from formic acid
Source: Royal Society of Chemistry journal article supplement (doi:10.1039/c6ra26793a), 2017-01-01
Supplement: c6ra26793a1.pdf [file c6ra26793a1.pdf]

**Facile synthesis of amine-functionalized SBA-15-supported bimetallic Au–Pd nanoparticles as an efficient catalyst for hydrogen generation from formic acid**

**Lixin Xu<sup>a</sup>, Fang Yao<sup>a</sup>, Jili Luo<sup>b</sup>, Chao Wan<sup>a,\*</sup>, Mingfu Ye<sup>a</sup>, Ping Cui<sup>a,\*</sup>, Yue**

**An<sup>c</sup>**

<sup>a</sup> College of Chemistry and Chemical Engineering, Anhui University of Technology, 59 Hudong Road, Ma'anshan 243002, China

<sup>b</sup> PetroChina Huabei Oilfield Company Gas Storage Management Service, 15 Battle Road, Renqiu 062550, China

<sup>c</sup> College of Chemical and Biological Engineering, Zhejiang University, 38 Zheda Road, Hangzhou 310027, China

---

\* Corresponding author. Tel.: +86 555 2311807; Fax: +86 555 2311822.

E-mail address: wanchao1219@hotmail.com (Chao Wan)/cokecp@outlook.com(Ping Cui)

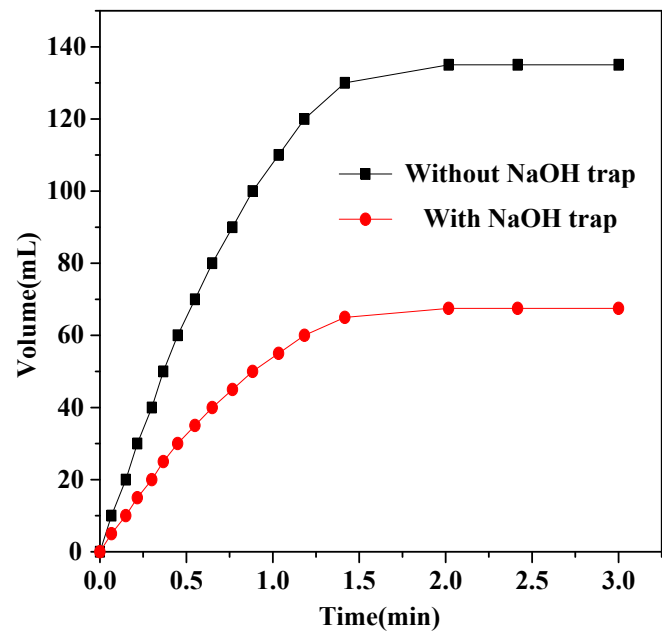

**Fig. S1.** Gas generation by decomposition of FA/SF vs time catalyzed by Au<sub>2</sub>Pd<sub>8</sub>/SBA-15-Amine at 323 K with and without NaOH trap (catalyst= 100 mg, n<sub>FA</sub>=3 mmol, n<sub>SF</sub>=1 mmol).

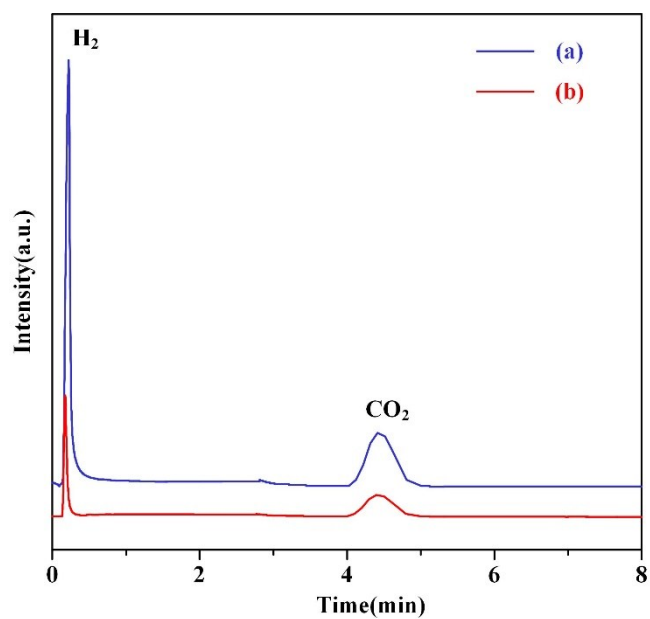

**Fig. S2.** GC spectrum using TCD for a) commercial mixture gas of H<sub>2</sub> and CO<sub>2</sub>, and b) evolved gas from FA/FS aqueous solution ( $n_{\text{FA}} = 3$  mmol,  $n_{\text{SF}} = 1$  mmol) over Au<sub>2</sub>Pd<sub>8</sub>/SBA-15-Amine at 323 K.

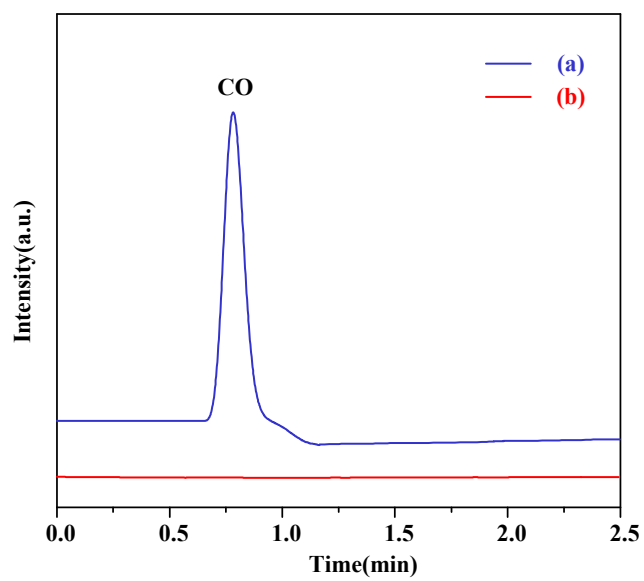

**Fig. S3.** GC spectrum using FID-Methanator for the a) commercial pure CO, and b) evolved gas from FA/FS aqueous solution ( $n_{\text{FA}} = 3$  mmol,  $n_{\text{SF}} = 1$  mmol) over  $\text{Au}_2\text{Pd}_8/\text{SBA-15-Amine}$  at 323 K.

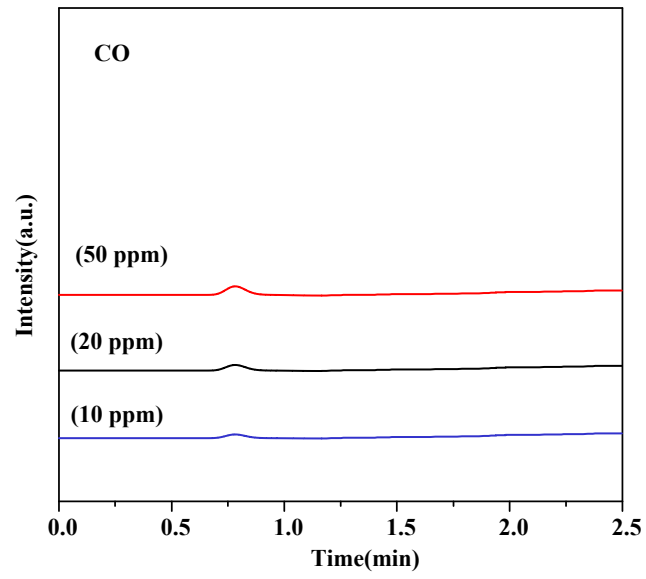

**Fig. S4.** GC spectrum using FID-Methanator for the commercial CO in different concentration, like 10 ppm, 20 ppm, 50 ppm.

**Table S1.** ICP-AES results of AuPd/SBA-15-Amine catalysts

| Catalyst                                          | Au<br>(wt%) | Pd<br>(wt%) | Au-Pd initial<br>composition<br>(molar ratio) | Au-Pd final<br>composition<br>(molar ratio) | Final<br>Metals/Catalyst<br>(mmol/100 mg) |
|---------------------------------------------------|-------------|-------------|-----------------------------------------------|---------------------------------------------|-------------------------------------------|
| Au <sub>8</sub> Pd <sub>2</sub> /SBA-15-<br>Amine | 16.29       | 2.47        | 80:20                                         | 78:22                                       | 0.106                                     |
| Au <sub>6</sub> Pd <sub>4</sub> /SBA-15-<br>Amine | 12.38       | 4.26        | 60:40                                         | 61:39                                       | 0.103                                     |
| Au <sub>4</sub> Pd <sub>6</sub> /SBA-15-<br>Amine | 8.11        | 6.03        | 40:60                                         | 42:58                                       | 0.098                                     |
| Au <sub>2</sub> Pd <sub>8</sub> /SBA-15-<br>Amine | 3.69        | 9.04        | 20:80                                         | 18:82                                       | 0.104                                     |

**Table. S2** Comparison of AuPd/SBA-15-Amine catalyzed decomposition of FA/SF solution ( $n_{FA} = 3$  mmol,  $n_{SF} = 1$  mmol)

| Catalyst                                      | T/ K | Conversion/ % | TOF <sub>initial</sub> / h <sup>-1</sup> | H <sub>2</sub> /CO <sub>2</sub> ratio |
|-----------------------------------------------|------|---------------|------------------------------------------|---------------------------------------|
| Au <sub>8</sub> Pd <sub>2</sub> /SBA-15-Amine | 323  | 22.2          | 255                                      | 1:1                                   |
| Au <sub>6</sub> Pd <sub>4</sub> /SBA-15-Amine | 323  | 92.6          | 724                                      | 1:1                                   |
| Au <sub>4</sub> Pd <sub>6</sub> /SBA-15-Amine | 323  | 100           | 918                                      | 1:1                                   |
| Au <sub>2</sub> Pd <sub>8</sub> /SBA-15-Amine | 323  | 100           | 1786                                     | 1:1                                   |
| Au <sub>2</sub> Pd <sub>8</sub> /SBA-15-Amine | 303  | 81.5          | 518                                      | 1:1                                   |
| Au <sub>2</sub> Pd <sub>8</sub> /SBA-15-Amine | 313  | 100           | 758                                      | 1:1                                   |
| Au <sub>2</sub> Pd <sub>8</sub> /SBA-15-Amine | 333  | 100           | 2922                                     | 1:1                                   |

TOF<sub>initial</sub> is calculated when  $x_a$  reaches 20%.

**Table S3** TOF values for the decomposition of FA over various heterogeneous catalysts.<sup>a</sup>

| Catalyst                                                          | T(K) | TOF(h <sup>-1</sup> ) | E <sub>a</sub> (kJ/mol) | Reference |
|-------------------------------------------------------------------|------|-----------------------|-------------------------|-----------|
| Au <sub>2</sub> Pd <sub>8</sub> /SBA-15-Amine                     | 323  | 1786                  | 47.6                    | This work |
| L-Au <sub>4</sub> Pd <sub>6</sub>                                 | 298  | 1075                  | 21.98                   | S1        |
| Au <sub>6</sub> Pd <sub>4</sub> -L-Mg                             | 298  | 1120                  | 18.5                    | S2        |
| C-Au <sub>41</sub> Pd <sub>59</sub>                               | 323  | 230                   | 28 ±2                   | S3        |
| Ag <sub>0.2</sub> Au <sub>0.4</sub> Pd <sub>0.4</sub> /rGO        | 298  | 73.6                  |                         | S4        |
| Co <sub>0.30</sub> Au <sub>0.35</sub> Pd <sub>0.35</sub> /C       | 298  | 80                    |                         | S5        |
| Au@Pd/N-mrGO                                                      | 298  | 89.1                  |                         | S6        |
| AuPd-CeO <sub>2</sub> /N-rGO                                      | 298  | 52.9                  |                         | S7        |
| CoAuPd/DNA-rGO                                                    | 298  | 85.0                  |                         | S8        |
| PdNi@Pd/GNs-CB                                                    | 298  | 577                   |                         | S9        |
| Ag <sub>10</sub> Pd <sub>90</sub> /0.2CND/SBA-15                  | 323  | 893                   |                         | S10       |
| Co <sub>1.6</sub> Ag <sub>62.2</sub> Pd <sub>36.2</sub> /graphene | 298  | 110                   | 33.9                    | S11       |

<sup>a</sup> TOF is calculated when x<sub>a</sub> reaches 20%.



## Reference

- [S1] Wu S, Yang F, Sun PC, Chen TH. Au–Pd alloy catalyst with high performance for hydrogen generation from formic acid-formate solution at nearly 0 °C. *RSC Advances* 2014; **4**: 44500–44503.
- [S2] Wu S, Yang F, Wang H, Chen R, Sun PC, Chen TH. Mg<sup>2+</sup>-assisted low temperature reduction of alloyed AuPd/C: an efficient catalyst for hydrogen generation from formic acid at room temperature. *Chemical Communications* 2015; **51**: 10887–10890.
- [S3] Metin Ö, Sun XL, Sun SH. Monodisperse gold–palladium alloy nanoparticles and their composition-controlled catalysis in formic acid dehydrogenation under mild conditions. *Nanoscale* 2013; **5**: 910–912.
- [S4] Li SJ, Ping Y, Yan JM, Wang HL, Wu M, Jiang Q. Facile synthesis of AgAuPd/graphene with high performance for hydrogen generation from formic acid. *Journal of Materials Chemistry A* 2015; **3**: 14535–14538.
- [S5] Wang ZL, Yan JM, Ping Y, Wang HL, Zheng WT, Jiang Q. An Efficient CoAuPd/C Catalyst for Hydrogen Generation from Formic Acid at Room Temperature. *Angewandte Chemie International Edition* 2013; **52**: 4406–4409.
- [S6] Wang ZL, Yan JM, Wang HL, Ping Y, Jiang Q. Au@Pd core–shell nanoclusters growing on nitrogen-doped mildly reduced graphene oxide with enhanced catalytic performance for hydrogen generation from formic acid. *Journal of Materials Chemistry A* 2013; **1**: 12721–12725.
- [S7] Wang ZL, Yan JM, Zhang YF, Ping Y, Wang HL, Jiang Q. Facile synthesis of nitrogen-

doped graphene supported AuPd–CeO<sub>2</sub> nanocomposites with high-performance for hydrogen generation from formic acid at room temperature. *Nanoscale* 2014; **6**: 3073–3077.

[S8] Wang ZL, Wang HL, Yan JM, Ping Y, Song-II O, Li SJ, Jiang Q. DNA-directed growth of ultrafine CoAuPd nanoparticles on graphene as efficient catalysts for formic acid dehydrogenation. *Chemical Communications* 2014; **50**: 2732–2734.

[S9] Qin YL, Wang J, Meng FZ, Wang LM, Zhang XB. Efficient PdNi and PdNi@Pd-catalyzed hydrogen generation via formic acid decomposition at room temperature. *Chemical Communications* 2013; **49**: 10028–10030.

[S10] Xu LX, Jin B, Zhang J, Cheng DG, Chen FQ, An Y, Cui P, Wan C. Efficient hydrogen generation from formic acid using AgPd nanoparticles immobilized on carbon nitride-functionalized SBA-15. *RSC Advances* 2016; **6**: 46908–46914.

[S11] Yang L, Luo W, Cheng GZ. Monodisperse CoAgPd nanoparticles assembled on graphene for efficient hydrogen generation from formic acid at room temperature. *International Journal of Hydrogen Energy* 2016; **41**: 439–446.
